# Supplementary material
Source: publisher site journal article supplement (https://www.dovepress.com/article/598380)
Supplement: Supplementary file 1 [file 598380%20Supplementary%20Material.pdf]

**Supplementary Table 1** Clinical Effect Sizes for Upper Airway Obstruction Improvement Between Conventional OA and Advanced MAD Simulator

| <b>Site/Position</b> | <b>Complete or partial obstruction with OA (N<sub>1</sub>)</b> | <b>Improvement with MAD (N<sub>2</sub>, %)</b> | <b>Paired Odds Ratio (95% CI)</b> |
|----------------------|----------------------------------------------------------------|------------------------------------------------|-----------------------------------|
| <b>Velum</b>         |                                                                |                                                |                                   |
| Supine)              | 39                                                             | 18 (46.2%)                                     | 37.00 (2.23–613.99)               |
| Head rotation        | 32                                                             | 17 (53.1%)                                     | 35.00 (2.10–582.03)               |
| <b>Epiglottis</b>    |                                                                |                                                |                                   |
| Supine               | 20                                                             | 13 (65.0%)                                     | 5.40 (1.40–20.82)                 |
| Head rotation        | 18                                                             | 17 (94.4%)                                     | 35.00 (2.10–582.03)               |
| <b>Oropharynx</b>    |                                                                |                                                |                                   |
| Supine               | 11                                                             | 7 (63.6%)                                      | 15.00 (0.86–262.65)               |
| Head rotation        | 13                                                             | 8 (61.5%)                                      | 5.67 (1.00–32.14)                 |

---

| <b>Tongue base</b> |    |            |                     |
|--------------------|----|------------|---------------------|
| Supine             | 12 | 12 (100%)  | 25.00 (1.48–422.26) |
| Head rotation      | 13 | 12 (92.3%) | 8.33 (1.53–45.31)   |

---

**Notes:**

N<sub>1</sub> represents the total number of patients who exhibited partial or complete obstruction at the specified anatomical site while using the conventional OA. N<sub>2</sub> (%) indicates the number and percentage of these obstructed patients who demonstrated clinical improvement (defined as a shift from complete to partial or no obstruction, or from partial to no obstruction) after switching to the advanced MAD simulator. The paired Odds Ratios and 95% Confidence Intervals were calculated based on the discordant pairs of intervention responses. To account for zero cell frequencies in specific anatomical subgroups, the Haldane-Anscombe correction was applied by adding 0.5 to all cells in the contingency tables.

**Abbreviations:** CI, Confidence Interval; MAD, mandibular advancement device; OA, oral appliance.

**Supplementary Table 2** Comparison of AHI and lowest oxygen saturation (SpO<sub>2</sub>) across different positions and OA Interventions

|                        | No intervention |        | Conventional OA |                     | Advanced MAD simulator |                       | <i>P</i> |
|------------------------|-----------------|--------|-----------------|---------------------|------------------------|-----------------------|----------|
| <b>AHI</b>             |                 |        |                 |                     |                        |                       |          |
| Supine                 | 40.36           | ± 5.16 | 8.98            | ± 5.46 <sup>a</sup> | 4.41                   | ± 5.16 <sup>a</sup>   | <0.001*  |
| Head Rotation          | 31.95           | ± 5.43 | 15.40           | ± 5.75 <sup>a</sup> | 0.00                   | ± 5.59 <sup>a,b</sup> | <0.001*  |
| <b>ODI</b>             |                 |        |                 |                     |                        |                       |          |
| Supine                 | 39.73           | ± 5.11 | 9.72            | ± 5.59 <sup>a</sup> | 6.72                   | ± 5.25 <sup>a</sup>   | <0.001*  |
| Head Rotation          | 26.51           | ± 5.24 | 15.17           | ± 5.71              | 0.00                   | ± 5.54 <sup>a</sup>   | <0.001*  |
| <b>SpO<sub>2</sub></b> |                 |        |                 |                     |                        |                       |          |
| Supine                 | 82.44           | ± 1.69 | 88.33           | ± 1.73 <sup>a</sup> | 91.16                  | ± 1.77 <sup>a</sup>   | <0.001*  |
| Head Rotation          | 82.81           | ± 1.87 | 87.55           | ± 1.92 <sup>a</sup> | 92.98                  | ± 1.97 <sup>a,b</sup> | <0.001*  |

**Notes:**

<sup>a</sup>, *P* < 0.05 vs. No Intervention; <sup>b</sup>, *P* < 0.05 vs. Conventional OA; \*, *P* < 0.05

The p-values for these comparisons were adjusted using the Sequential Bonferroni method.

**Abbreviations:** AHI, apnea-hypopnea index; MAD, mandibular advancement device; OA, oral appliance; ODI, Oxygen desaturation index; SpO<sub>2</sub>, peripheral oxygen saturation.

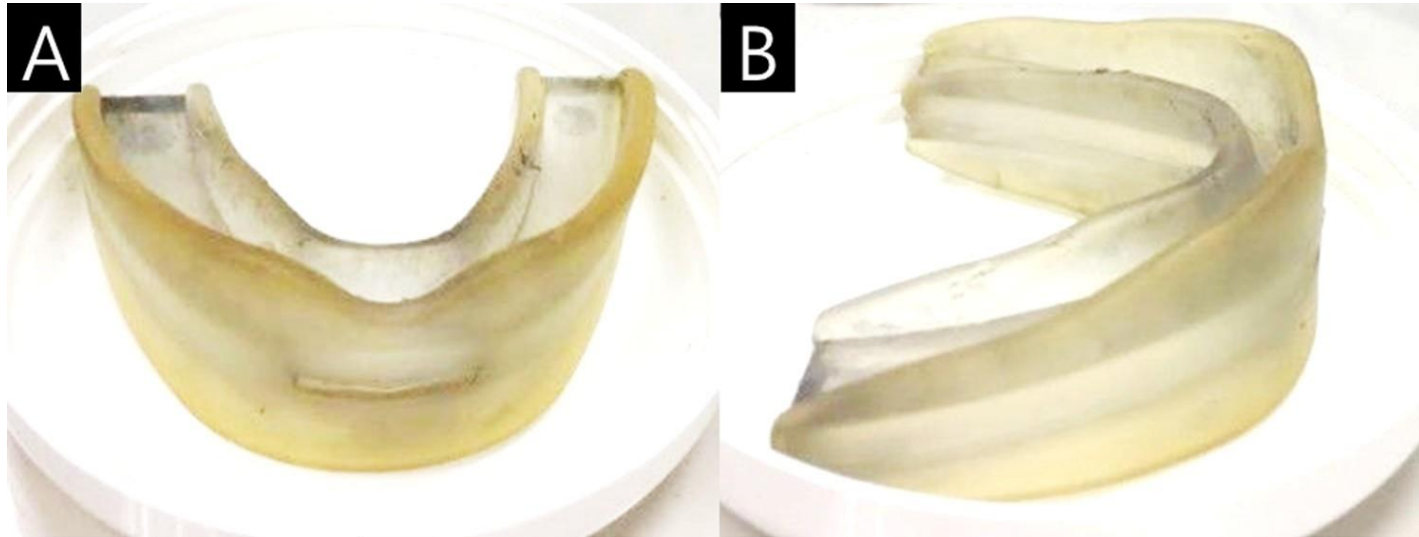

**Supplementary Figure 1**

Conventional edge-to-edge OA with breathing hole. The prefabricated OA used during DISE is shown from two perspectives: (A) frontal view demonstrating the central breathing hole and overall edge-to-edge design; (B) lateral view illustrating the occlusal relationship and vertical dimension of the device.

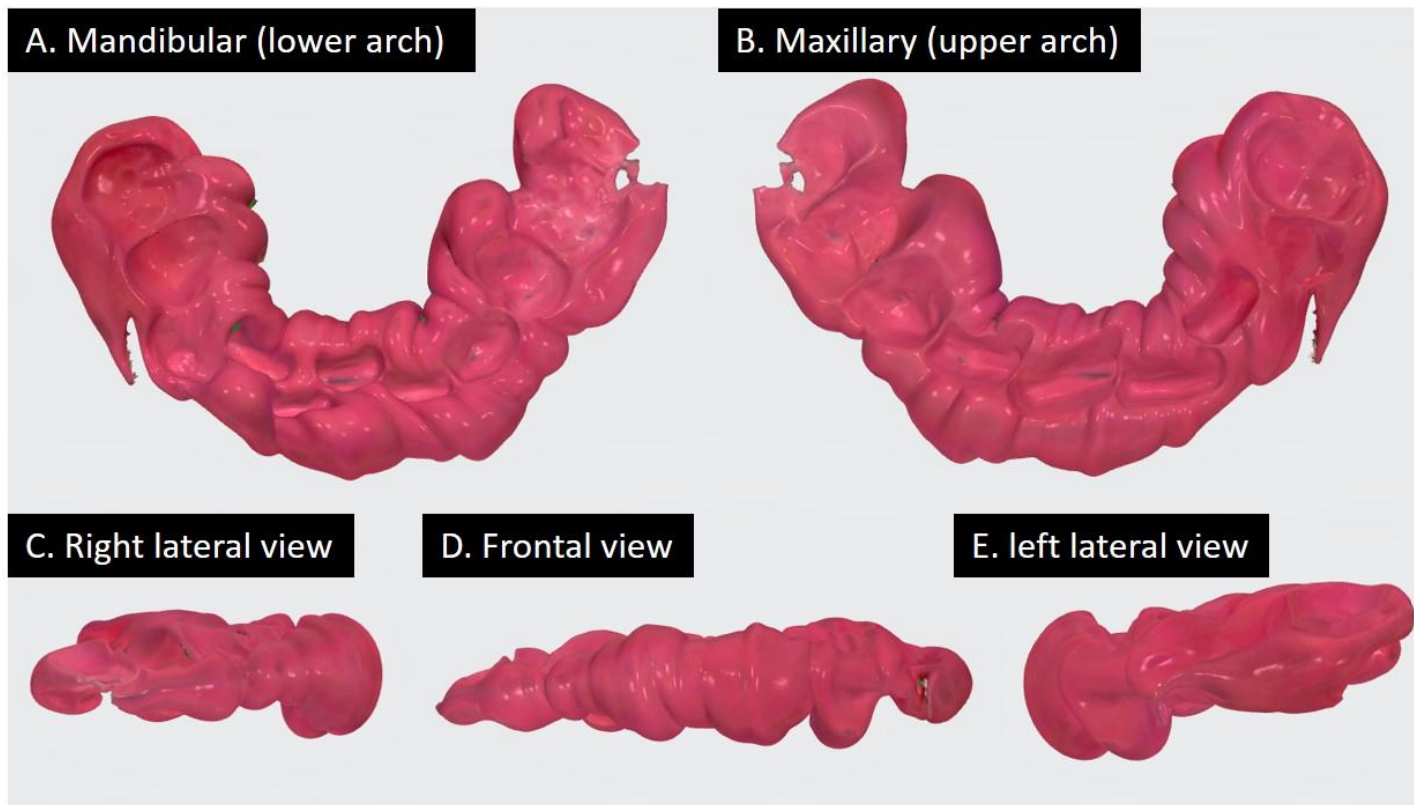

### Supplementary Figure 2

Fabrication of advanced MAD simulator Using "Regidur® I". The monoblock advanced MAD simulator without a breathing hole designed for use during DISE. The images display various perspectives of the device: (A) mandibular (lower arch), (B) maxillary (upper arch), (C) right lateral view, (D) frontal view, and (E) left lateral view.
